# Supplementary material for: Solution-processable erbium–ytterbium complex for potential planar optical amplifier application
Source: Royal Society of Chemistry journal article supplement (doi:10.1039/b709237g), 2007-01-01
Supplement: b709237g.pdf [file b709237g.pdf]

## Supplementary information

# Solution-processible erbium-ytterbium complex for potential planar optical amplifier application

Limei Song,<sup>a,b</sup> Xinhou Liu,<sup>a</sup> Zhen Zhen,<sup>\*a</sup> Cong Chen<sup>c</sup> and Daming Zhang<sup>c</sup>

<sup>a</sup>Technical Institute of Physics and Chemistry,

Chinese Academy of Sciences, Beijing 100080, China

<sup>b</sup>The Graduate university of Chinese Academy of Sciences, Beijing, China.

<sup>c</sup>State Key Laboratory on Integrated Optoelectronics, Jilin University Region, Changchun, China.

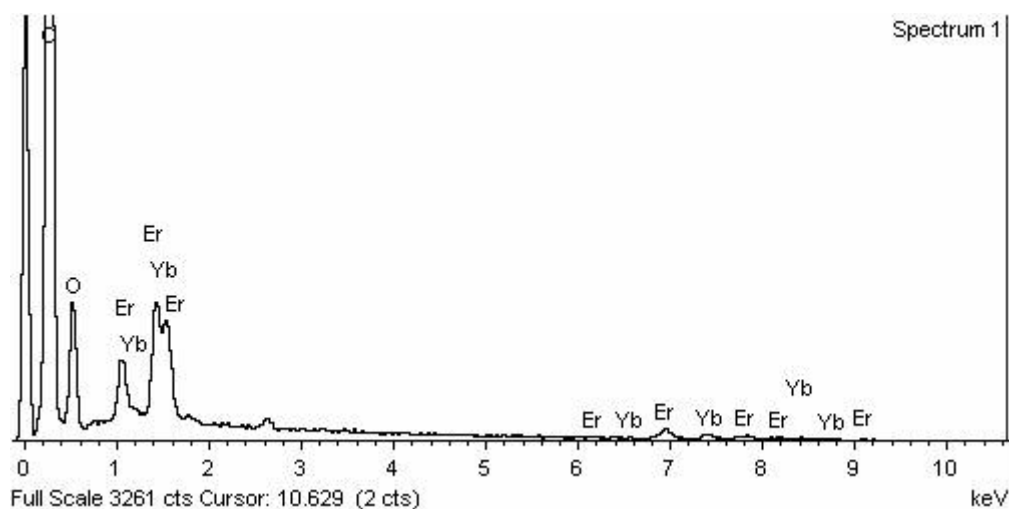

Figure 1S X-ray energy dispersive spectrum from the complex  $\text{Er}_{1.2}\text{Yb}_{0.8}(\text{PBA})_6(\text{Phen})_2$ .

Table 1S EDS analysis results for the complex  $\text{Er}_{1.2}\text{Yb}_{0.8}(\text{PBA})_6(\text{Phen})_2$ .

| Element | Weight% | Atomic% |
|---------|---------|---------|
| C K     | 9.86    | 66.29   |
| O K     | 5.43    | 27.43   |
| Er M    | 7.73    | 3.73    |
| Yb M    | 5.46    | 2.55    |
| Totals  | 28.47   |         |

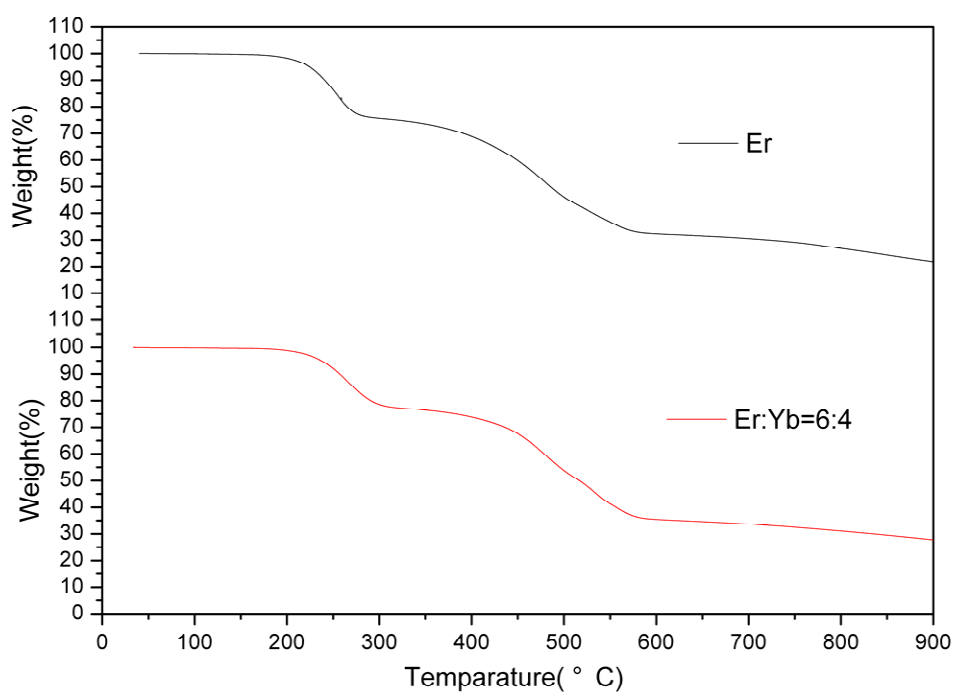

Figure 2S The TGA diagrams of  $\text{Er}_2(\text{PBa})_6(\text{Phen})_2$  and  $\text{Er}_{1.2}\text{Yb}_{0.8}(\text{PBa})_6(\text{Phen})_2$  complexes.

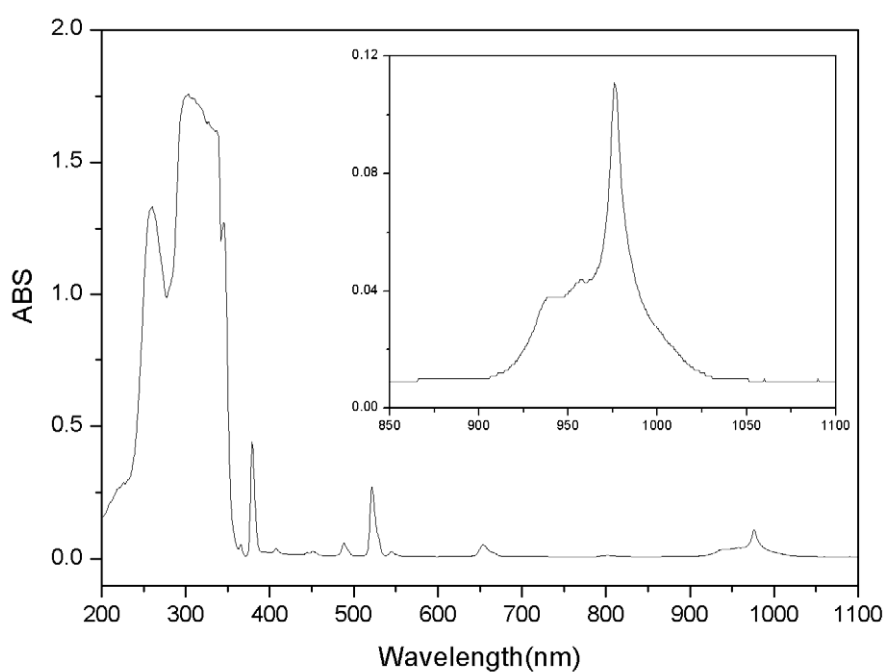

Figure 3S The UV-Vis absorption spectrum of  $\text{Er}_{1.2}\text{Yb}_{0.8}(\text{PBa})_6(\text{Phen})_2$  complex in THF. The inset is its absorption around 980nm.

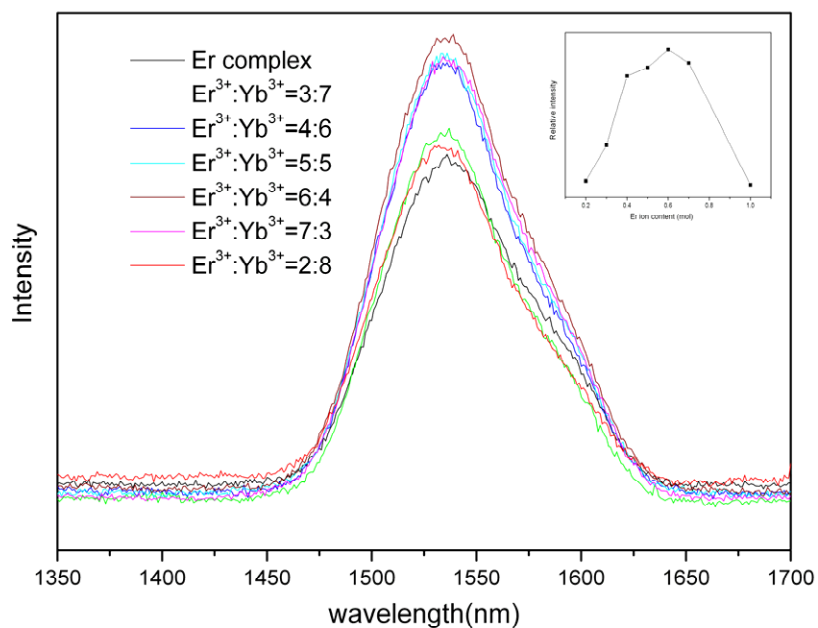

Figure 4S The NIR PL spectra of Er<sub>x</sub>Yb<sub>2-x</sub>(PBA)<sub>6</sub>(Phen)<sub>2</sub> (x = 0.4, 0.6, 0.8, 1.0, 1.2, 1.4, 2 ) complexes in THF at a complex concentration of 0.0543 M excited at 975 nm.

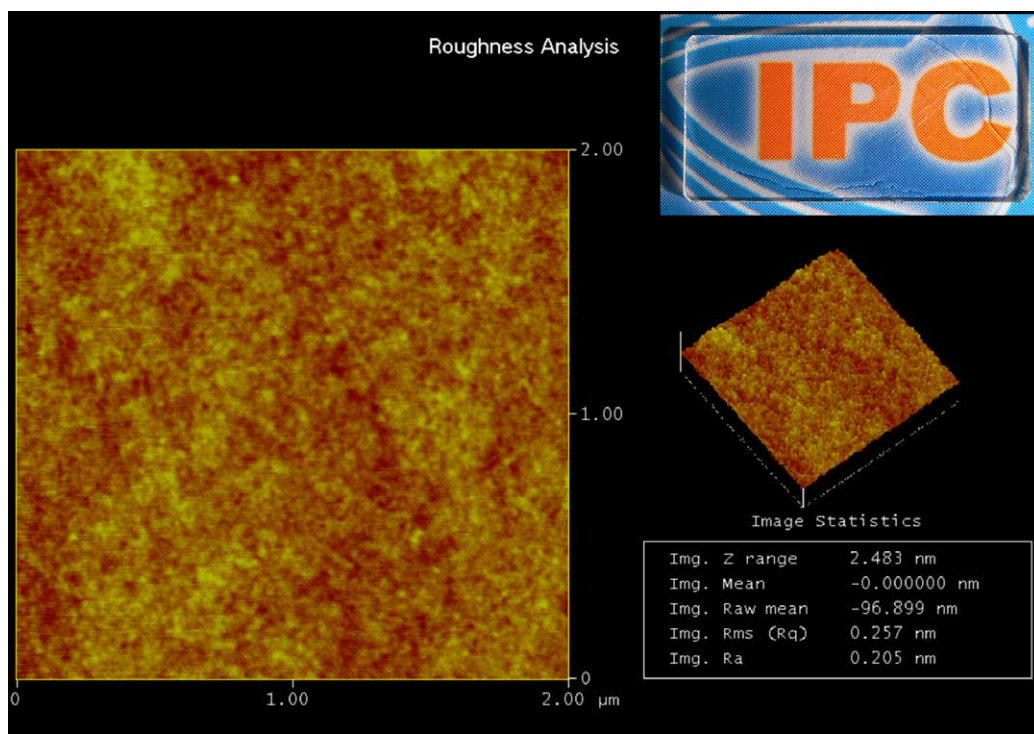

Figure 5S AFM image and photograph of Er<sub>1.2</sub>Yb<sub>0.8</sub>(PBA)<sub>6</sub>(Phen)<sub>2</sub> thin film. The right top-corner is the photograph.

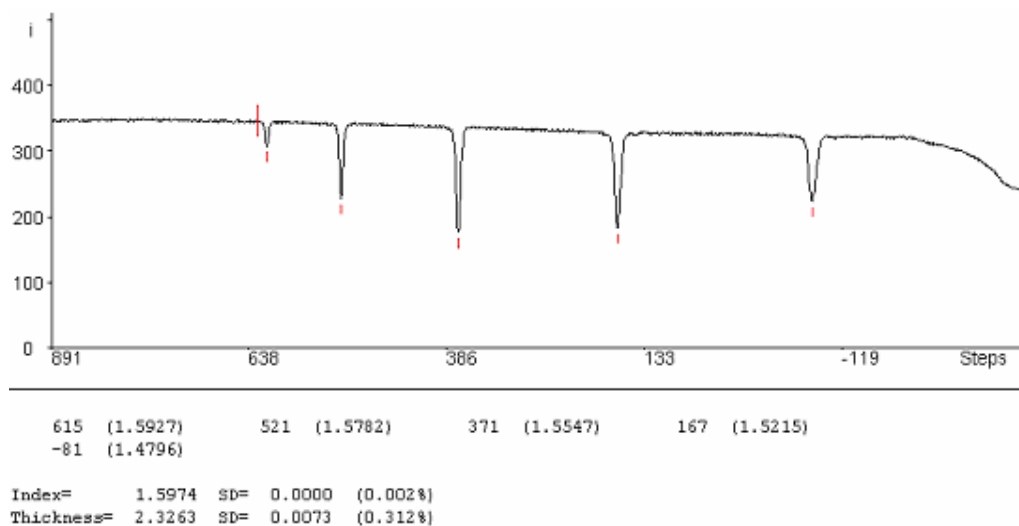

Figure 6S The refractive index at 633 nm and thickness of  $\text{Er}_{1.2}\text{Yb}_{0.8}(\text{PBa})_6(\text{Phen})_2$  complex film.

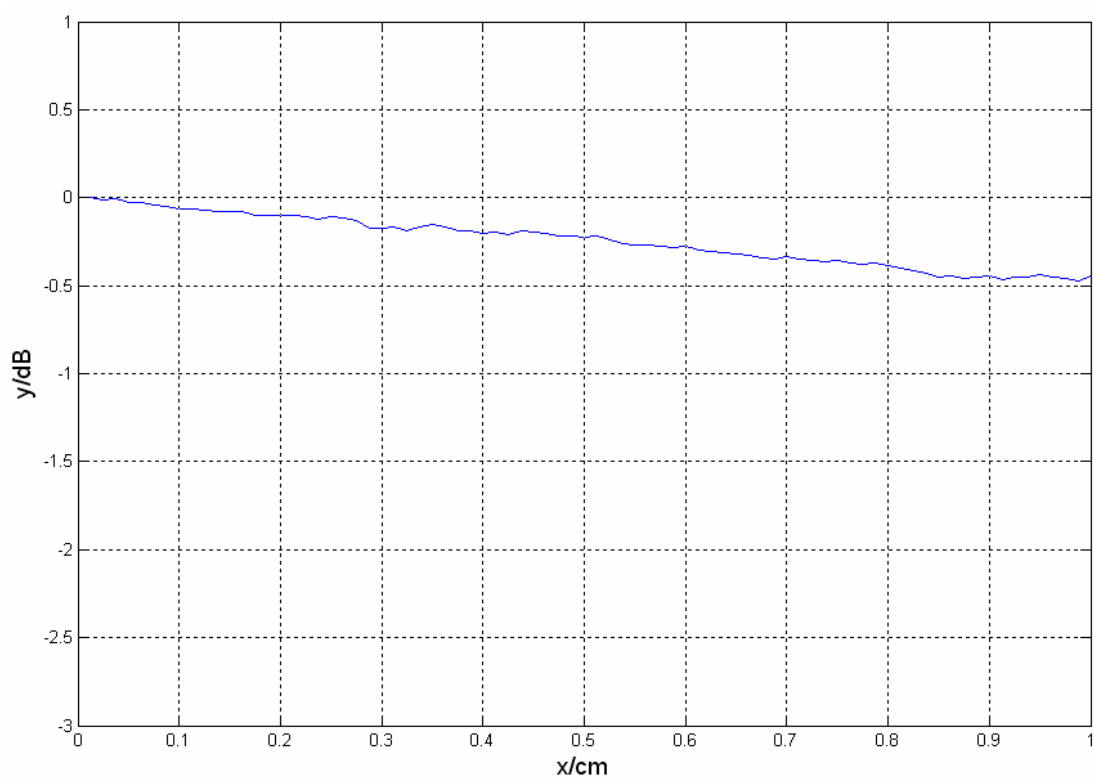

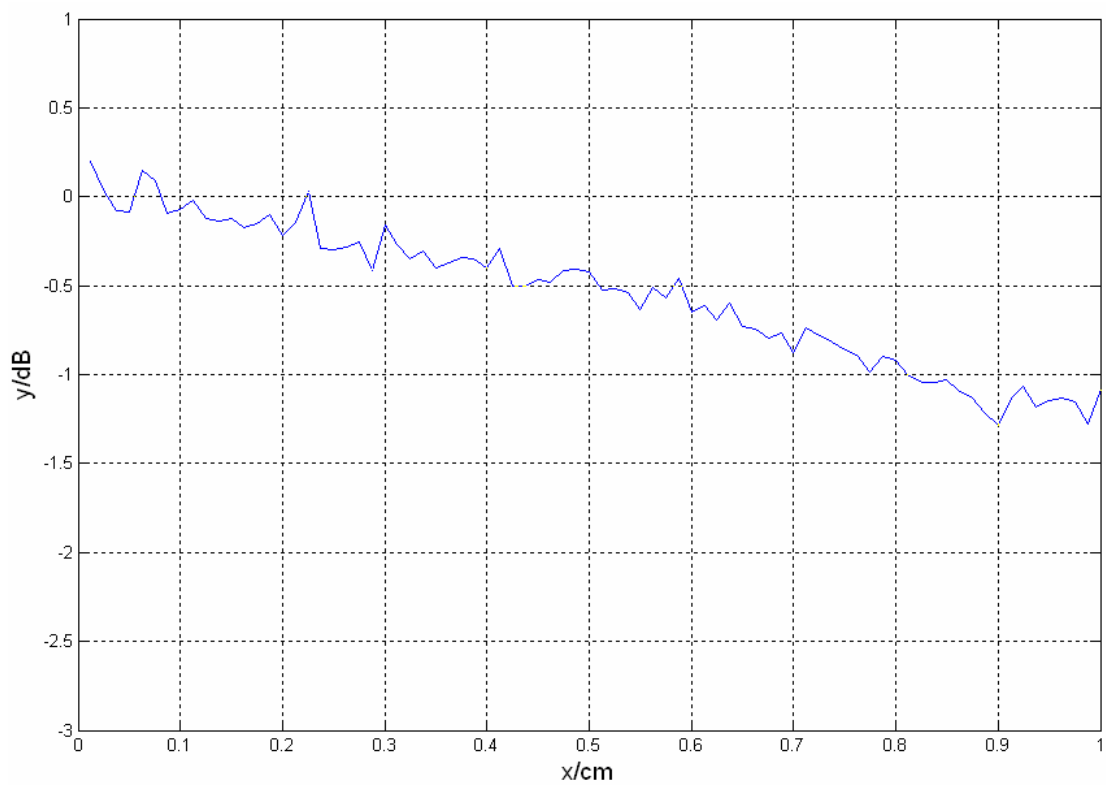

(b)

Figure 7S The optical loss diagrams of planar waveguides at 633 nm. (a)

$\text{Er}_{1.2}\text{Yb}_{0.8}(\text{PBA})_6(\text{Phen})_2$  complex film; (b) the PC polymer film.
